# Supplementary material
Source: PubMed Central journal article supplement (PMC534512)

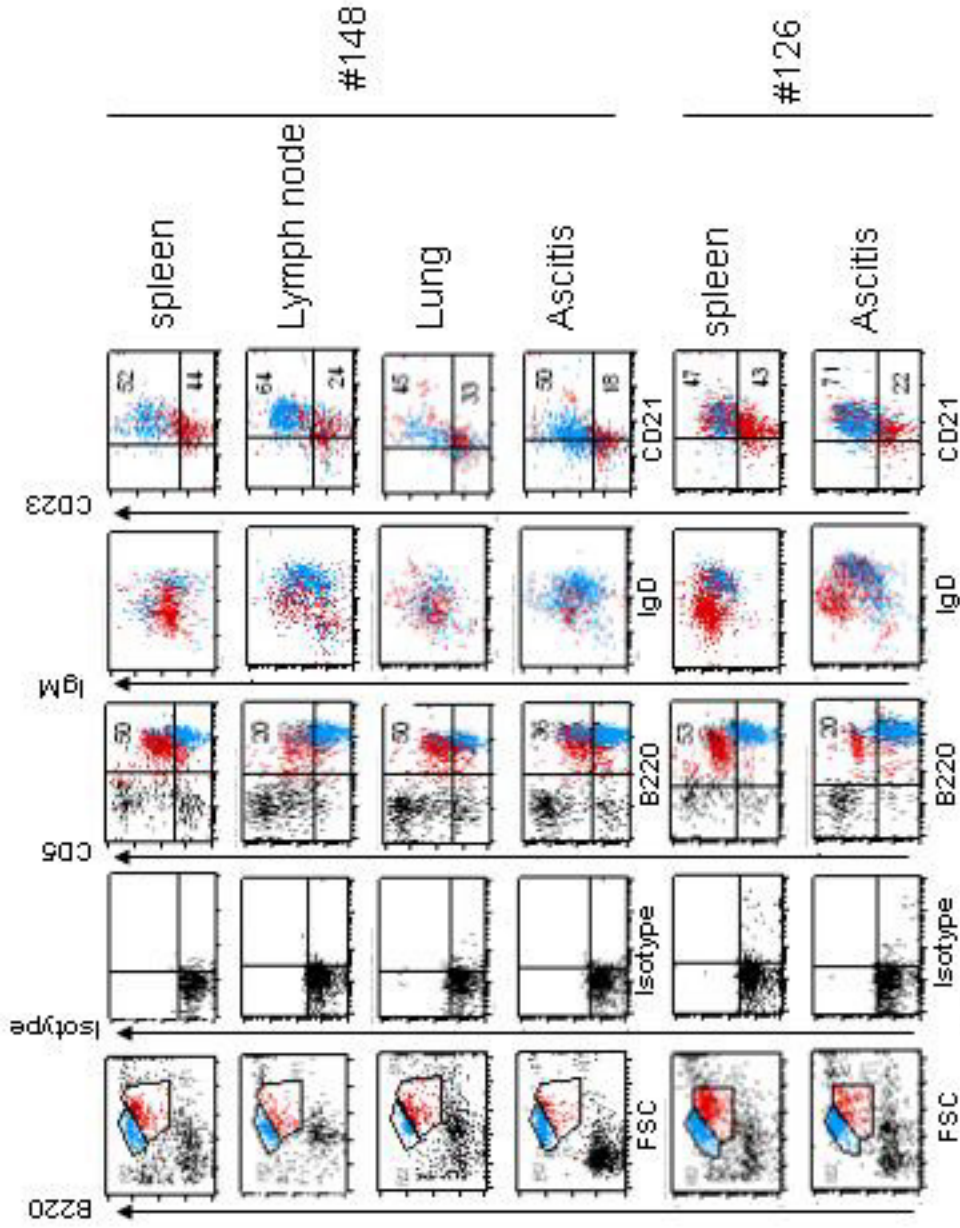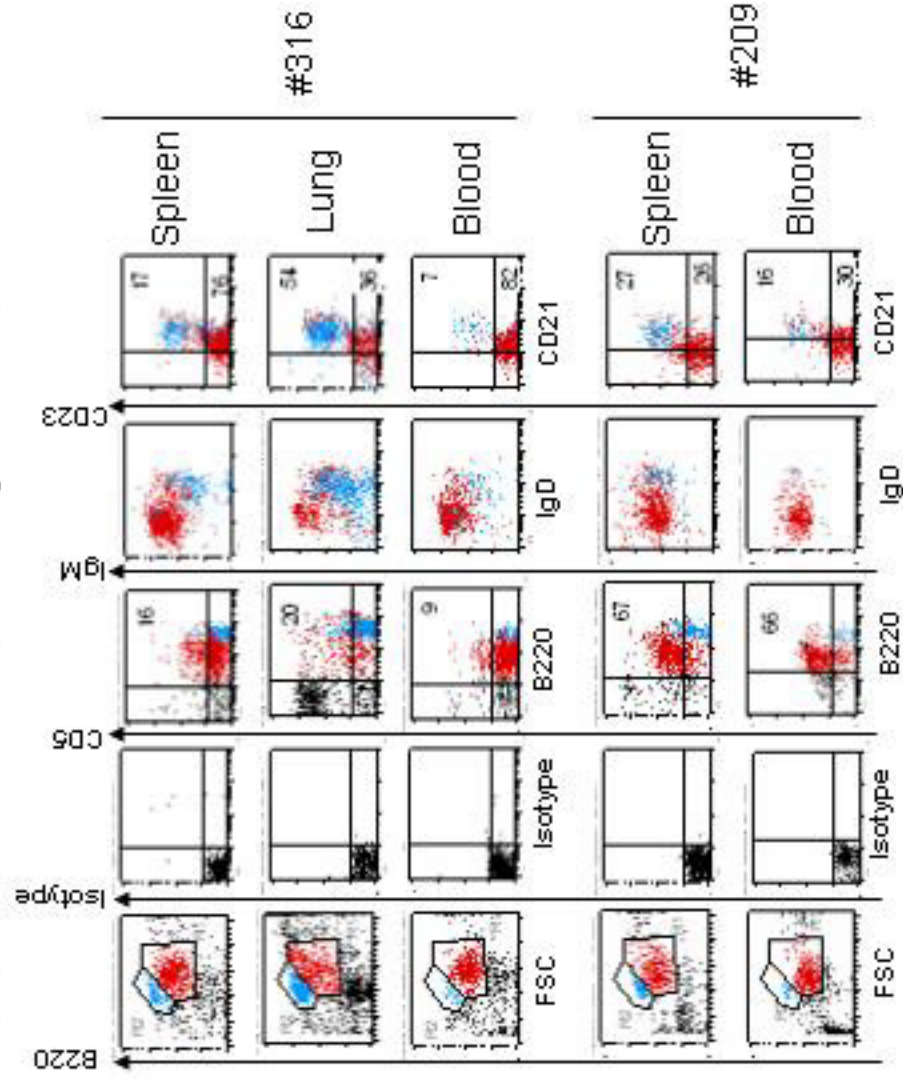

Supplement: pnas_101_47_16600__1.pdf [file pnas_101_47_16600__1.pdf]
